# Supplementary material for: Anodic electrochemistry of mono- and dinuclear aminophenylferrocene and diphenylaminoferrocene complexes
Source: Royal Society of Chemistry journal article supplement (doi:10.1039/c8dt00584b), 2018-01-01
Supplement: c8dt00584b1.pdf [file c8dt00584b1.pdf]

# **Anodic Electrochemistry of Mono- and Dinuclear Aminophenylferrocene and Diphenylaminoferrocene Complexes**

Ming-Xing Zhang,<sup>†,§</sup> Jing Zhang,<sup>†,¶,§</sup> Jun Yin,<sup>†</sup> František Hartl,<sup>\*,‡</sup> Sheng-Hua Liu<sup>\*,†</sup>

<sup>†</sup>*Key Laboratory of Pesticide and Chemical Biology, Ministry of Education, College of Chemistry, Central China Normal University, Wuhan 430079, P.R. China*

<sup>¶</sup>*College of Chemistry, The Hong Kong University of Science and Technology, Clear Water Bay, Kowloon, Hong Kong*

<sup>‡</sup>*Department of Chemistry, University of Reading, Whiteknights, Reading RG6 6AD, UK*

<sup>§</sup>These authors contributed equally to this work.

**Table S1.** Crystal data and parameters of data collection and refinement for complex **1d**.

| Complex                                             | <b>1d</b>                                                     |
|-----------------------------------------------------|---------------------------------------------------------------|
| Formula                                             | C <sub>24</sub> H <sub>23</sub> FeNO <sub>2</sub>             |
| Formula weight                                      | 413.28                                                        |
| Temperature (K)                                     | 296 (2)                                                       |
| Crystal system                                      | Monoclinic                                                    |
| Space group                                         | <i>P2(1)/c</i>                                                |
| <i>a</i> (Å)                                        | 17.7696 (18)                                                  |
| <i>b</i> (Å)                                        | 9.6825 (10)                                                   |
| <i>c</i> (Å)                                        | 22.947 (2)                                                    |
| $\alpha$ (°)                                        | 90                                                            |
| $\beta$ (°)                                         | 92.595 (2)                                                    |
| $\gamma$ (°)                                        | 90                                                            |
| <i>V</i> (Å <sup>3</sup> )                          | 3944.1 (7)                                                    |
| <i>Z</i>                                            | 8                                                             |
| Density (calculated) (Mg/m <sup>3</sup> )           | 1.392                                                         |
| Absorption coefficient (mm <sup>-1</sup> )          | 0.784                                                         |
| <i>F</i> (000)                                      | 1728                                                          |
| Crystal size (mm <sup>3</sup> )                     | 0.20 × 0.10 × 0.10                                            |
| Theta range for data collection (°)                 | 1.78 to 27.45                                                 |
| Index ranges                                        | -23 ≤ <i>h</i> ≤ 23, -12 ≤ <i>k</i> ≤ 12, -29 ≤ <i>l</i> ≤ 29 |
| Reflections collected                               | 32836                                                         |
| Independent reflections                             | 8967 [ <i>R</i> (int) = 0.0562]                               |
| Max. and min. transmission                          | 0.9257 and 0.9118                                             |
| Data / restraints / parameters                      | 8967 / 0 / 510                                                |
| Goodness-of-fit on <i>F</i> <sup>2</sup>            | 0.997                                                         |
| Final <i>R</i> indices [ <i>I</i> > 2σ( <i>I</i> )] | <i>R</i> 1 = 0.0443, <i>wR</i> 2 = 0.1093                     |
| <i>R</i> indices (all data)                         | <i>R</i> 1 = 0.0826, <i>wR</i> 2 = 0.1266                     |
| Largest diff. peak and hole (e. <sup>-3</sup> )     | 0.279 and -0.336                                              |

**Table S2.** Bond lengths [Å] and angles [deg] for complex **1d**.

| Bond lengths [Å] |           |         |           |
|------------------|-----------|---------|-----------|
| Fe1—C3           | 2.028 (3) | C7—C8   | 1.410 (4) |
| Fe1—C2           | 2.034 (2) | C11—C16 | 1.369 (4) |
| Fe1—C10          | 2.036 (3) | C11—C12 | 1.383 (3) |
| Fe1—C4           | 2.038 (3) | O1—C14  | 1.372 (3) |
| Fe1—C9           | 2.038 (3) | O1—C17  | 1.408 (4) |
| Fe1—C7           | 2.040 (3) | C19—C20 | 1.369 (4) |
| Fe1—C6           | 2.040 (3) | C2—C3   | 1.416 (4) |
| Fe1—C8           | 2.044 (3) | C21—C22 | 1.382 (4) |
| Fe1—C5           | 2.061 (3) | C21—C20 | 1.386 (4) |
| Fe1—C1           | 2.072 (2) | C9—C8   | 1.403 (4) |
| N1—C1            | 1.411 (3) | C9—C10  | 1.408 (4) |
| N1—C18           | 1.425 (3) | C10—C6  | 1.415 (4) |
| N1—C11           | 1.439 (3) | C13—C12 | 1.376 (4) |
| O2—C21           | 1.373 (3) | C13—C14 | 1.378 (4) |
| O2—C24           | 1.421 (3) | C22—C23 | 1.383 (4) |
| C18—C23          | 1.387 (3) | C16—C15 | 1.387 (4) |
| C18—C19          | 1.394 (3) | C15—C14 | 1.379 (4) |
| C1—C2            | 1.422 (4) | C4—C3   | 1.405 (4) |
| C1—C5            | 1.425 (4) | C4—C5   | 1.421 (4) |
| C7—C6            | 1.403 (4) | C7—C8   | 1.410 (4) |

  

| Bond angles [deg] |             |             |             |
|-------------------|-------------|-------------|-------------|
| C3—Fe1—C2         | 40.79 (10)  | C8—Fe1—C1   | 152.56 (11) |
| C3—Fe1—C10        | 153.66 (13) | C5—Fe1—C1   | 40.34 (10)  |
| C2—Fe1—C10        | 164.75 (12) | C1—N1—C18   | 124.0 (2)   |
| C3—Fe1—C4         | 40.45 (12)  | C1—N1—C11   | 114.3 (2)   |
| C2—Fe1—C4         | 68.27 (11)  | C18—N1—C11  | 117.4 (2)   |
| C10—Fe1—C4        | 120.30 (13) | C21—O2—C24  | 117.2 (2)   |
| C3—Fe1—C9         | 119.25 (12) | C23—C18—C19 | 117.4 (2)   |
| C2—Fe1—C9         | 152.74 (13) | C23—C18—N1  | 124.1 (2)   |

|            |             |             |             |
|------------|-------------|-------------|-------------|
| C10—Fe1—C9 | 40.45 (13)  | C19—C18—N1  | 118.5 (2)   |
| C4—Fe1—C9  | 109.02 (12) | N1—C1—C2    | 123.4 (2)   |
| C3—Fe1—C7  | 126.54 (12) | N1—C1—C5    | 129.1 (2)   |
| C2—Fe1—C7  | 107.12 (11) | C2—C1—C5    | 107.4 (2)   |
| C10—Fe1—C7 | 67.95 (12)  | N1—C1—Fe1   | 130.19 (17) |
| C4—Fe1—C7  | 164.45 (13) | C2—C1—Fe1   | 68.32 (14)  |
| C9—Fe1—C7  | 67.84 (12)  | C5—C1—Fe1   | 69.40 (15)  |
| C3—Fe1—C6  | 163.97 (12) | C6—C7—C8    | 108.2 (3)   |
| C2—Fe1—C6  | 126.45 (11) | C6—C7—Fe1   | 69.89 (16)  |
| C10—Fe1—C6 | 40.64 (12)  | C8—C7—Fe1   | 69.96 (17)  |
| C4—Fe1—C6  | 154.30 (13) | C16—C11—C12 | 119.5 (2)   |
| C9—Fe1—C6  | 68.03 (12)  | C16—C11—N1  | 120.4 (2)   |
| C7—Fe1—C6  | 40.23 (11)  | C12—C11—N1  | 119.9 (2)   |
| C3—Fe1—C8  | 107.69 (13) | C14—O1—C17  | 116.8 (3)   |
| C2—Fe1—C8  | 118.47 (11) | C9—C10—Fe1  | 69.86 (17)  |
| C10—Fe1—C8 | 67.85 (12)  | C6—C10—Fe1  | 69.82 (16)  |
| C4—Fe1—C8  | 127.47 (12) | C12—C13—C14 | 119.6 (2)   |
| C9—Fe1—C8  | 40.20 (12)  | C19—C20—C21 | 120.9 (3)   |
| C7—Fe1—C8  | 40.41 (11)  | C13—C12—C11 | 120.5 (3)   |
| C6—Fe1—C8  | 67.84 (12)  | C21—C22—C23 | 120.4 (2)   |
| C3—Fe1—C5  | 68.16 (12)  | C9—C8—C7    | 108.0 (3)   |
| C2—Fe1—C5  | 68.13 (11)  | C9—C8—Fe1   | 69.68 (17)  |
| C10—Fe1—C5 | 109.30 (12) | C7—C8—Fe1   | 69.63 (16)  |
| C4—Fe1—C5  | 40.57 (11)  | C11—C16—C15 | 120.6 (3)   |
| C9—Fe1—C5  | 128.55 (12) | C14—C15—C16 | 119.3 (3)   |
| C7—Fe1—C5  | 153.13 (12) | C3—C4—C5    | 108.3 (2)   |
| C6—Fe1—C5  | 119.96 (12) | C3—C4—Fe1   | 69.41 (16)  |
| C8—Fe1—C5  | 165.55 (12) | C5—C4—Fe1   | 70.59 (15)  |
| C3—Fe1—C1  | 68.23 (11)  | C22—C23—C18 | 121.3 (2)   |
| C2—Fe1—C1  | 40.51 (10)  | O1—C14—C13  | 115.3 (3)   |
| C10—Fe1—C1 | 127.92 (12) | C8—Fe1—C1   | 152.56 (11) |
| C4—Fe1—C1  | 68.06 (11)  | C5—Fe1—C1   | 40.34 (10)  |
| C9—Fe1—C1  | 165.82 (12) | C1—N1—C18   | 124.0 (2)   |

|           |             |           |           |
|-----------|-------------|-----------|-----------|
| C7—Fe1—C1 | 118.78 (11) | C1—N1—C11 | 114.3 (2) |
| C6—Fe1—C1 | 108.18 (11) |           |           |

---

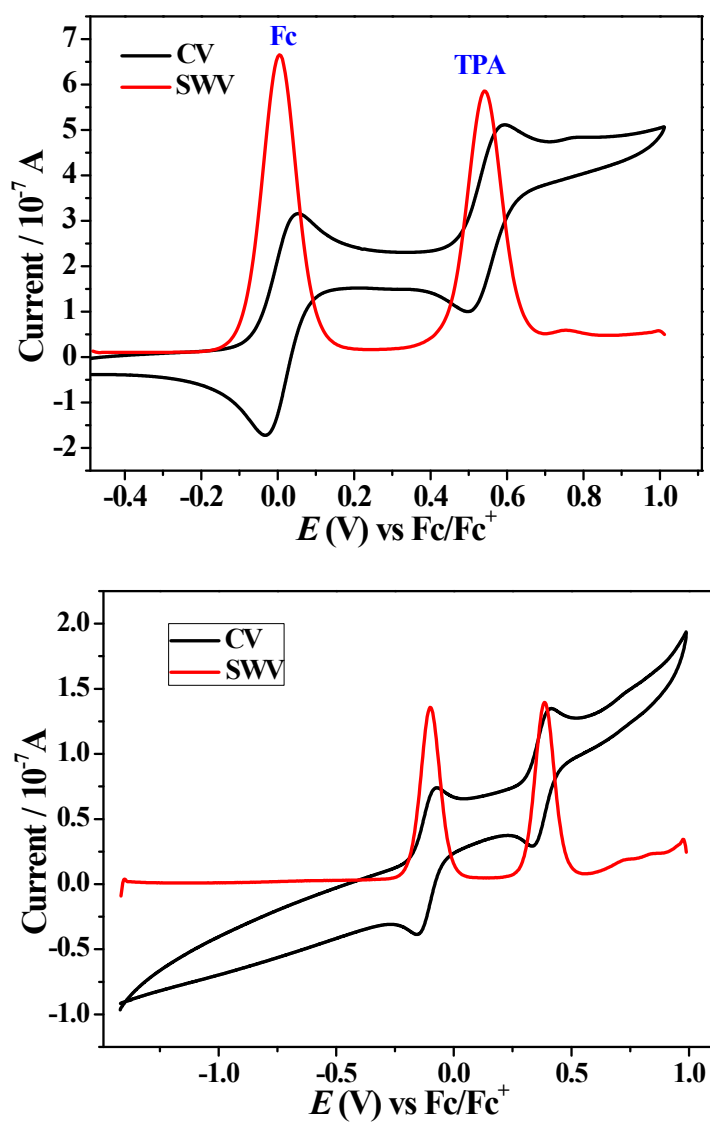

**Figure S1.** Cyclic voltammograms (CV, at  $\nu = 50 \text{ mV s}^{-1}$ ; black line) and corresponding square-wave voltammograms (SWV, at  $f = 10 \text{ Hz}$  and  $t_p = 25 \text{ mV}$ ; red line) of TPA (top, with ferrocene present as the internal standard), and M4TPPD (bottom) in  $\text{CH}_2\text{Cl}_2/n\text{-Bu}_4\text{NPF}_6$ .

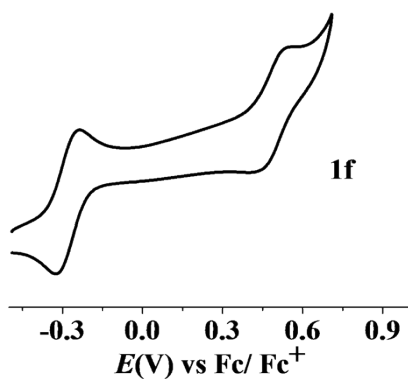

**Figure S2.** The curtailed two-anodic-step cyclic voltammogram (CV) of **1f** in  $\text{CH}_2\text{Cl}_2/n\text{-Bu}_4\text{NPF}_6$  at  $\nu = 50 \text{ mV s}^{-1}$ .

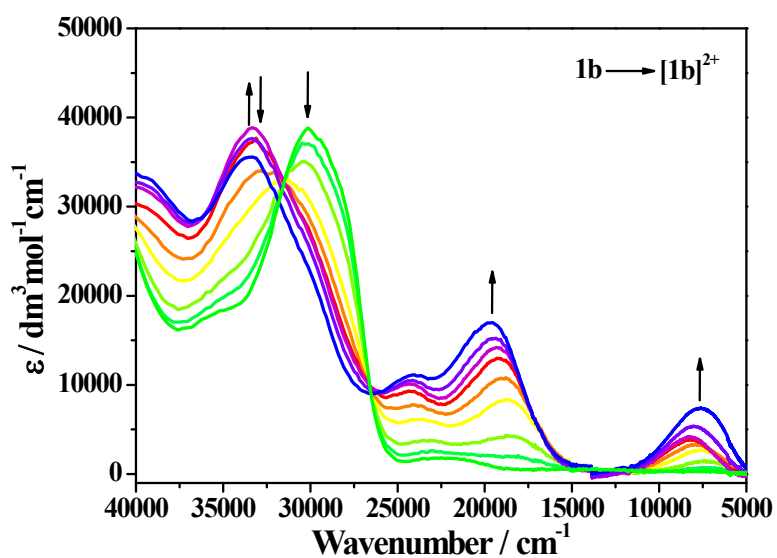

**Figure S3.** Changes in UV-vis-NIR absorption spectra recorded during the oxidation of complex **1b** to  $[\mathbf{1b}]^{2+}$  in  $\text{CH}_2\text{Cl}_2/10^{-1} \text{ M } n\text{-Bu}_4\text{NPF}_6$  at 298 K within an OTTLE cell. The intermediate absorption of  $[\mathbf{1b}]^+$  is poorly resolved due to pronounced redox disproportionation of the monocation.

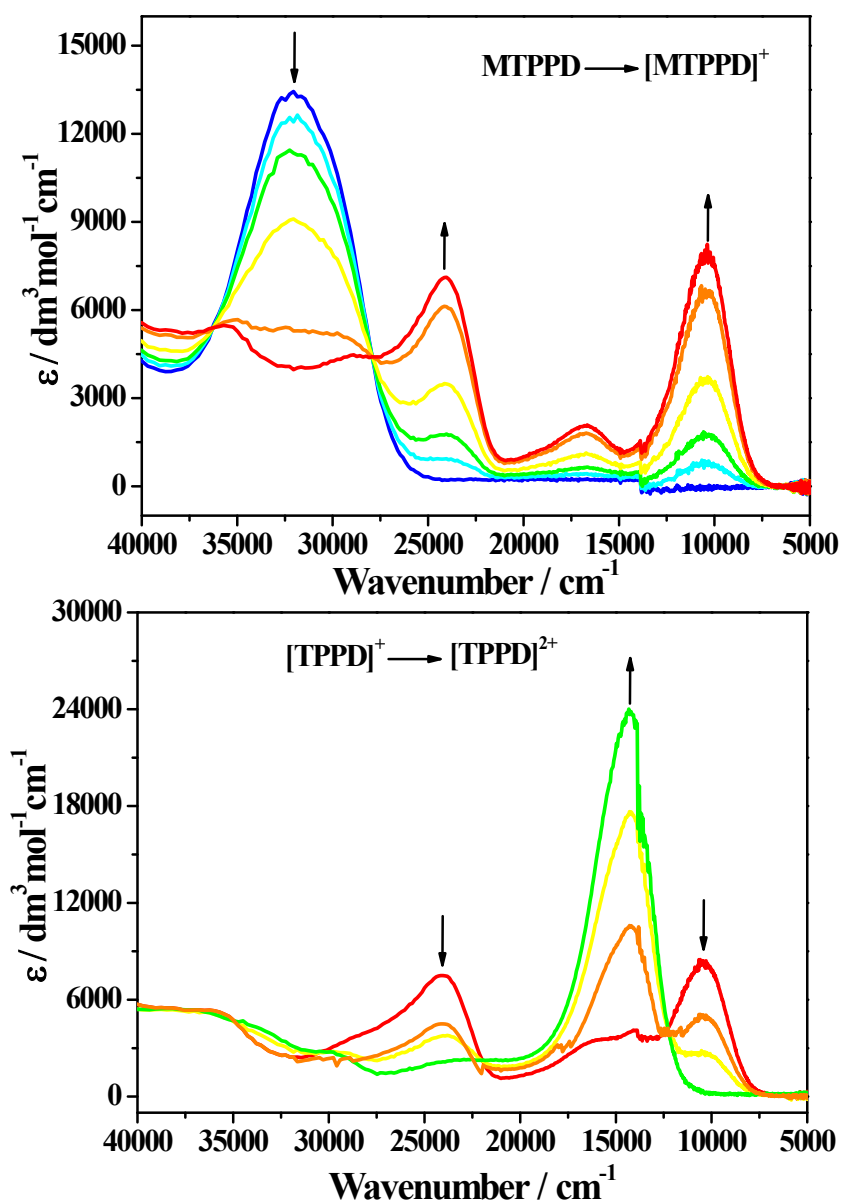

**Figure S4.** Changes in UV-vis-NIR absorption spectra recorded during the oxidation of reference compound **MTPPD** to **[MTPPD]<sup>+</sup>** (top) and **[MTPPD]<sup>2+</sup>** (bottom) in  $\text{CH}_2\text{Cl}_2/10^{-1} \text{ M } n\text{-Bu}_4\text{NPF}_6$  at 298 K within an OTTLE cell.

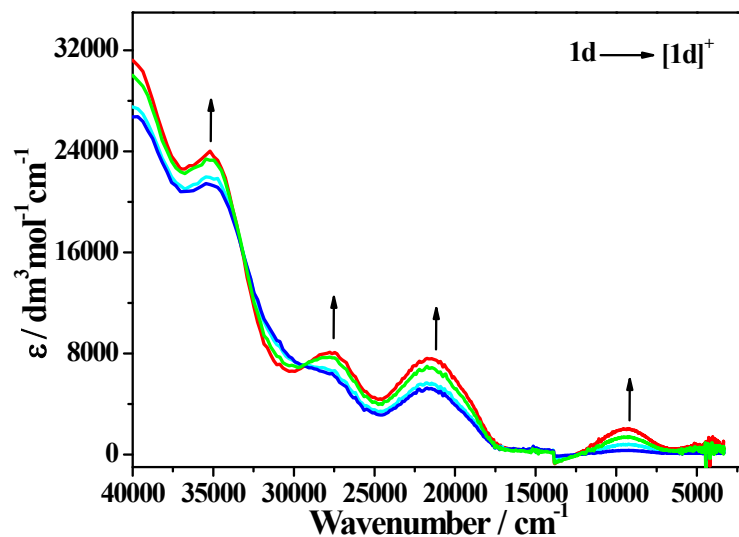

**Figure S5.** UV-vis-NIR spectral changes recorded during the reversible Fc-localized oxidation of complex **1d** to **[1d]<sup>+</sup>** in  $\text{CH}_2\text{Cl}_2/10^{-1} \text{ M } n\text{-Bu}_4\text{NPF}_6$  at 298 K within an OTTLE cell.

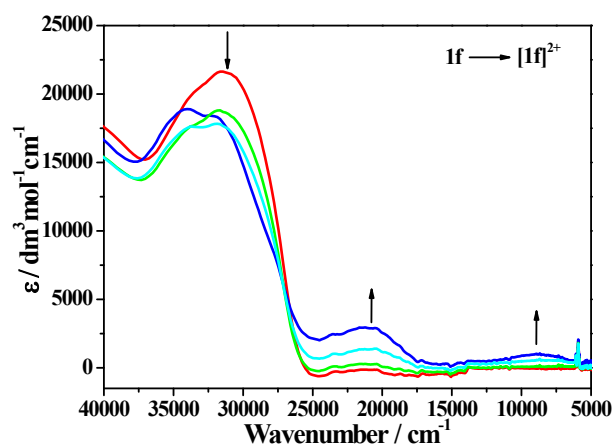

**Figure S6.** Changes in UV-vis-NIR absorption recorded during the unresolved bielectronic oxidation of dinuclear complex **1f** to **[1f]<sup>2+</sup>** in  $\text{CH}_2\text{Cl}_2/10^{-1} \text{ M } n\text{-Bu}_4\text{NPF}_6$  at 298 K within an OTTLE cell. The subsequent oxidation to **[1f]<sup>3+</sup>** was complicated by low solubility of the ultimate product.



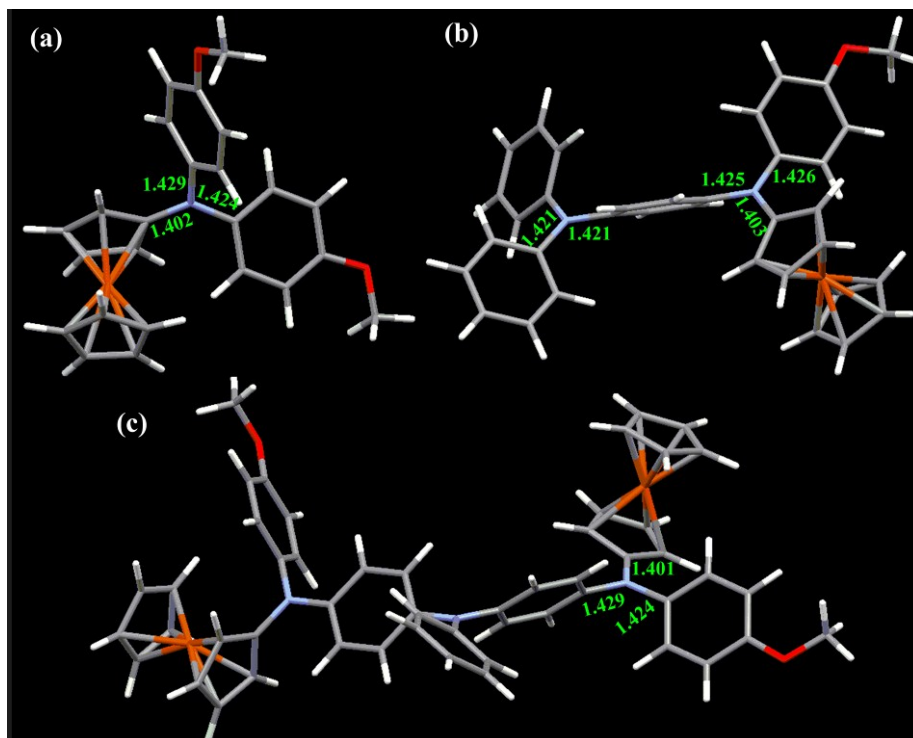

**Figure S7.** The DFT-optimized geometric structures of **1d** (a), **1e** (b) and **1f** (c).

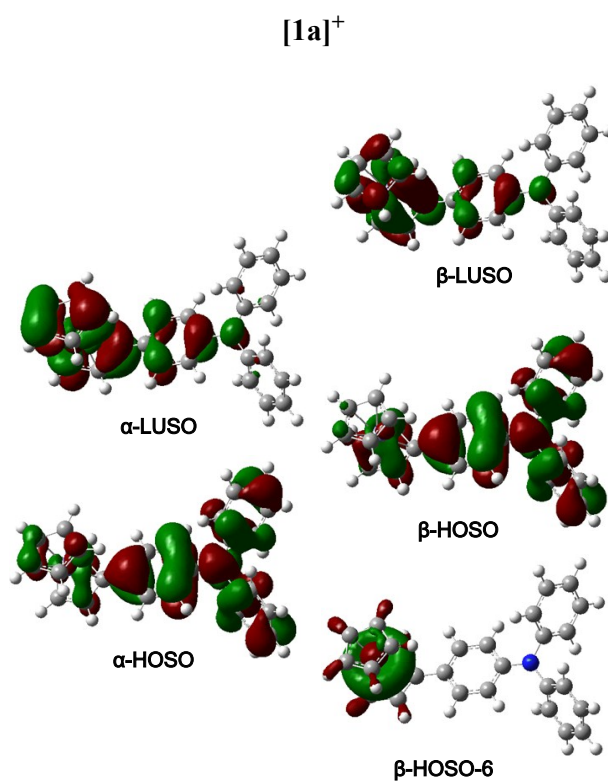

**Figure S8.** Spin orbitals involved in the major electronic excitations of  $[1a]^+$ . B3LYP /6-31G\* (Fe: Lan12DZ) /CPCM /CH<sub>2</sub>Cl<sub>2</sub>.

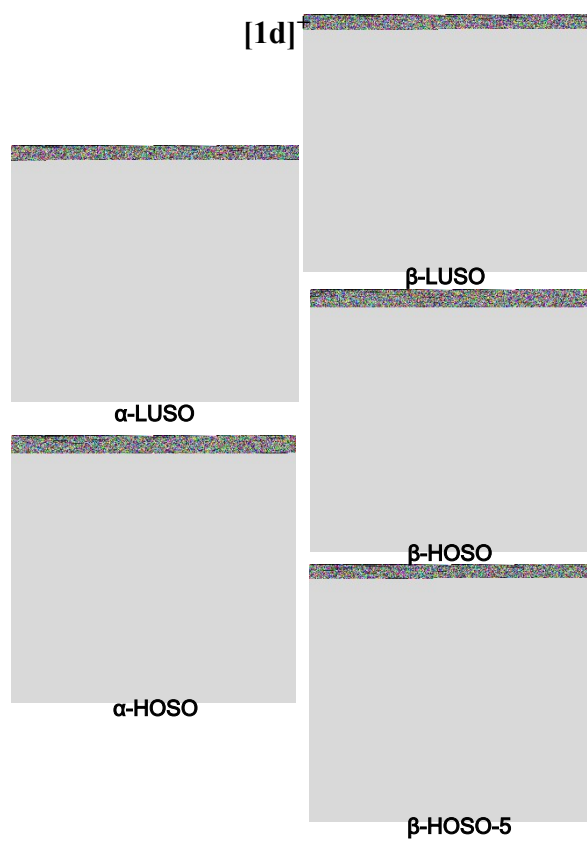

**Figure S9.** Spin orbitals involved in the major electronic excitations of  $[1d]^+$ . B3LYP /6-31G\* (Fe: Lanl2DZ) /CPCM /CH<sub>2</sub>Cl<sub>2</sub>.

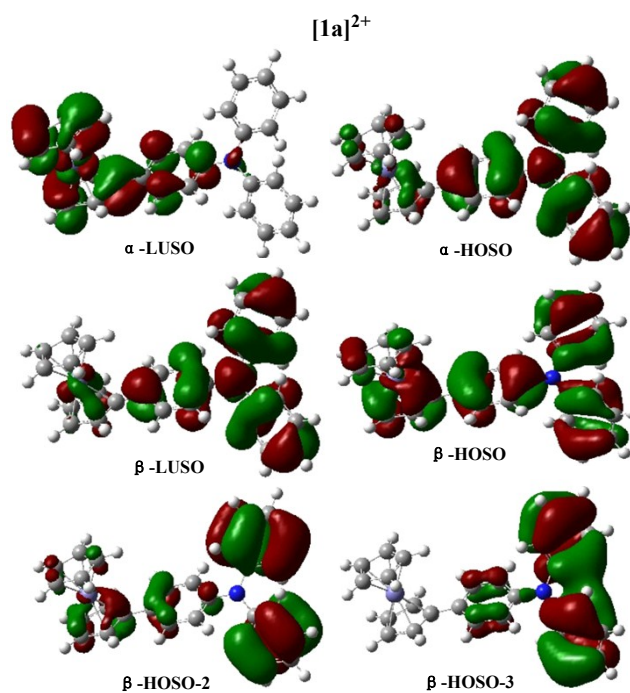

**Figure S10.** Spin orbitals involved in the major electronic excitations of  $[1a]^{2+}$  (biradical state).

B3LYP /6-31G\* (Fe: Lan12DZ) /CPCM /CH<sub>2</sub>Cl<sub>2</sub>.

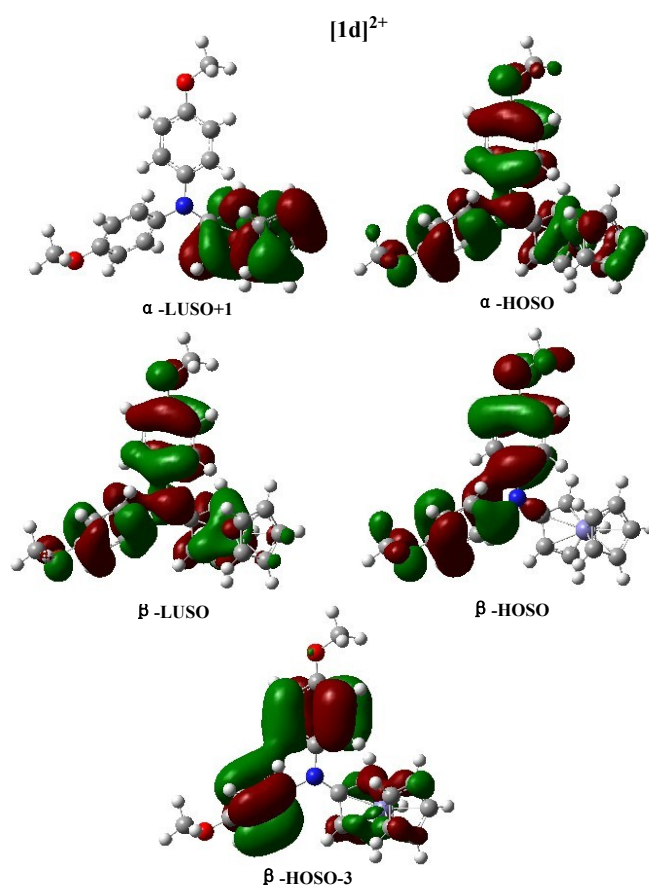

**Figure S11.** Spin orbitals involved in the major electronic excitations of  $[1d]^{2+}$  (biradical state).

B3LYP /6-31G\* (Fe: Lanl2DZ) /CPCM /CH<sub>2</sub>Cl<sub>2</sub>.

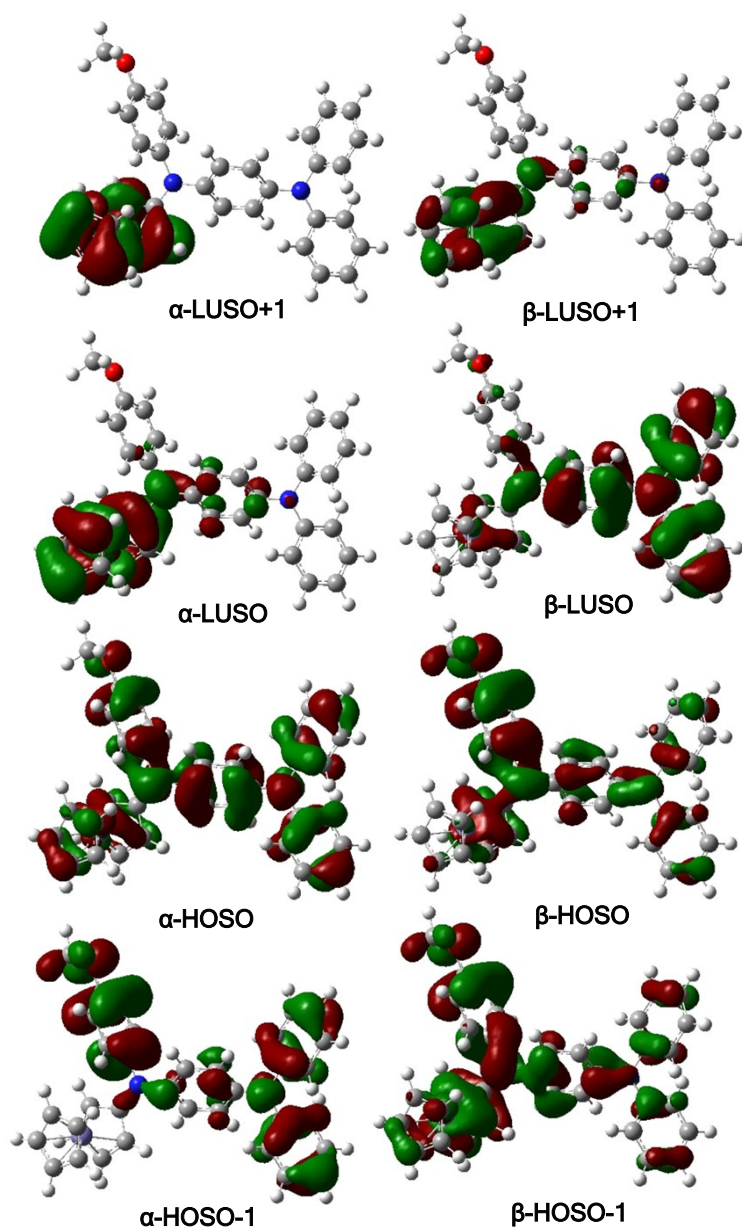

**Figure S12.** Frontier spin orbitals of [1e]<sup>2+</sup> (biradical state). B3LYP /6-31G\* (Fe: Lanl2DZ) /CPCM /CH<sub>2</sub>Cl<sub>2</sub>.

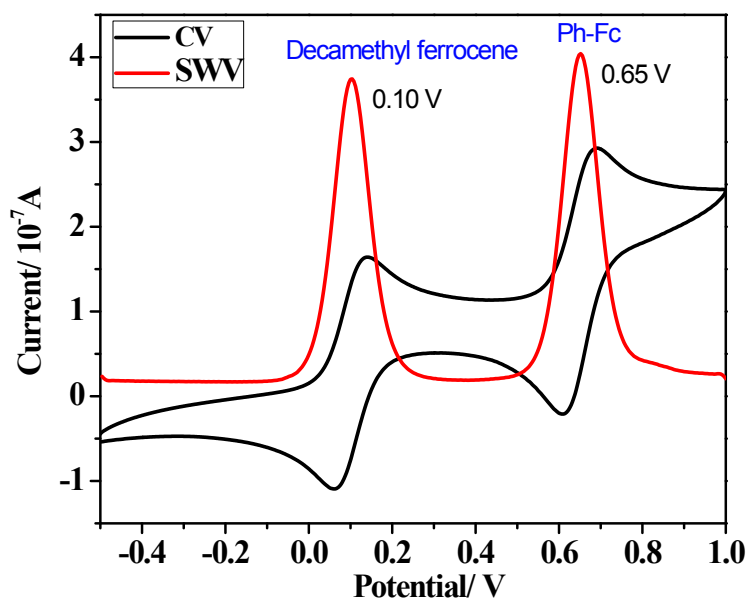

**Figure S13.** The cyclic voltammogram (CV, black line;  $\nu = 50 \text{ mV s}^{-1}$ ) and the corresponding square-wave voltammogram (SWV, red line; at  $f = 10 \text{ Hz}$  and  $t_p = 25 \text{ mV}$ ) of reference phenylferrocene, Ph-Fc, in  $\text{CH}_2\text{Cl}_2/n\text{-Bu}_4\text{NPF}_6$ . The oxidation potential of Ph-Fc is  $E_{1/2} = +0.04 \text{ V}$  vs ferrocene/ferrocenium ( $\text{Fc}/\text{Fc}^+$ ). The electronic absorption of  $[\text{Ph-Fc}]^+$  is presented in Figure S14.

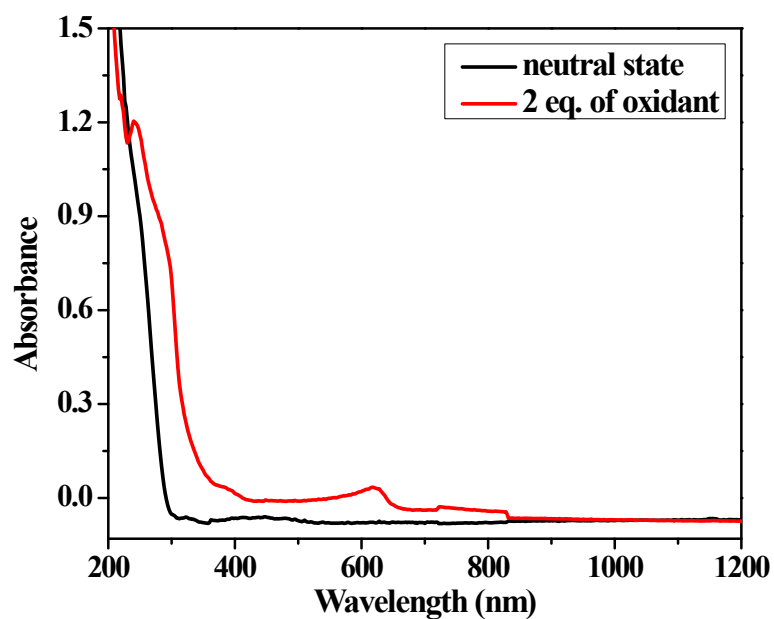

**Figure S14.** Electronic absorption spectra of  $10^{-2} \text{ M}$  Ph-Fc (black line) and  $[\text{Ph-Fc}]^+$  (red line) obtained by chemical oxidation with  $\text{AgPF}_6$  in  $\text{CH}_2\text{Cl}_2$  at 298 K. The simulated spectra of  $[\text{Ph-Fc}]^+$  and corresponding electronic transitions obtained with TD-DFT methods are depicted in Figures S15-S17.

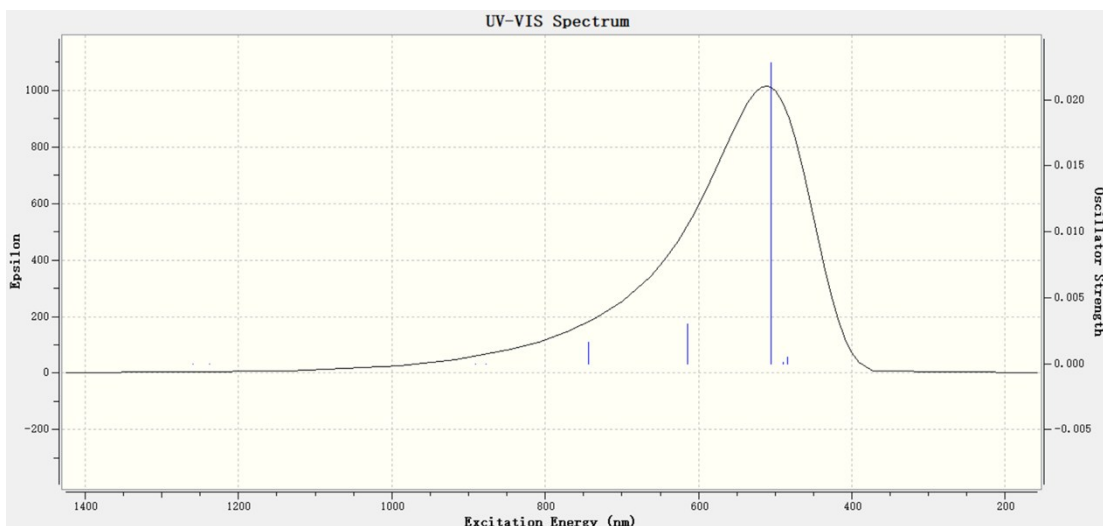

Figure S15. Simulated electronic absorption of  $[\text{Ph-Fc}]^+$ . B3LYP/6-31G\*/CPCM/CH<sub>2</sub>Cl<sub>2</sub>.

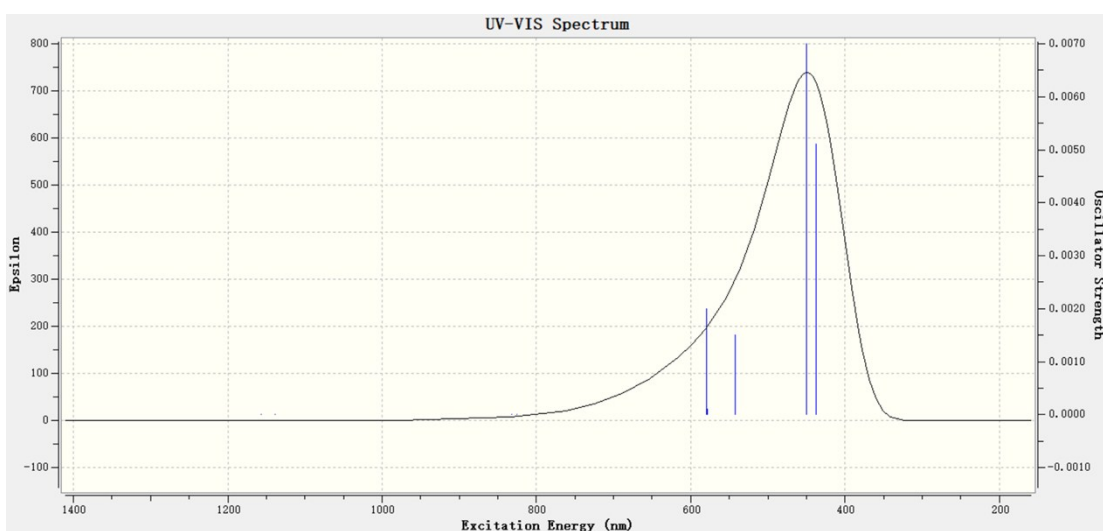

Figure S16. Simulated electronic absorption of  $[\text{Ph-Fc}]^+$ ; CAM-B3LYP/6-31G\*/CPCM/CH<sub>2</sub>Cl<sub>2</sub>.

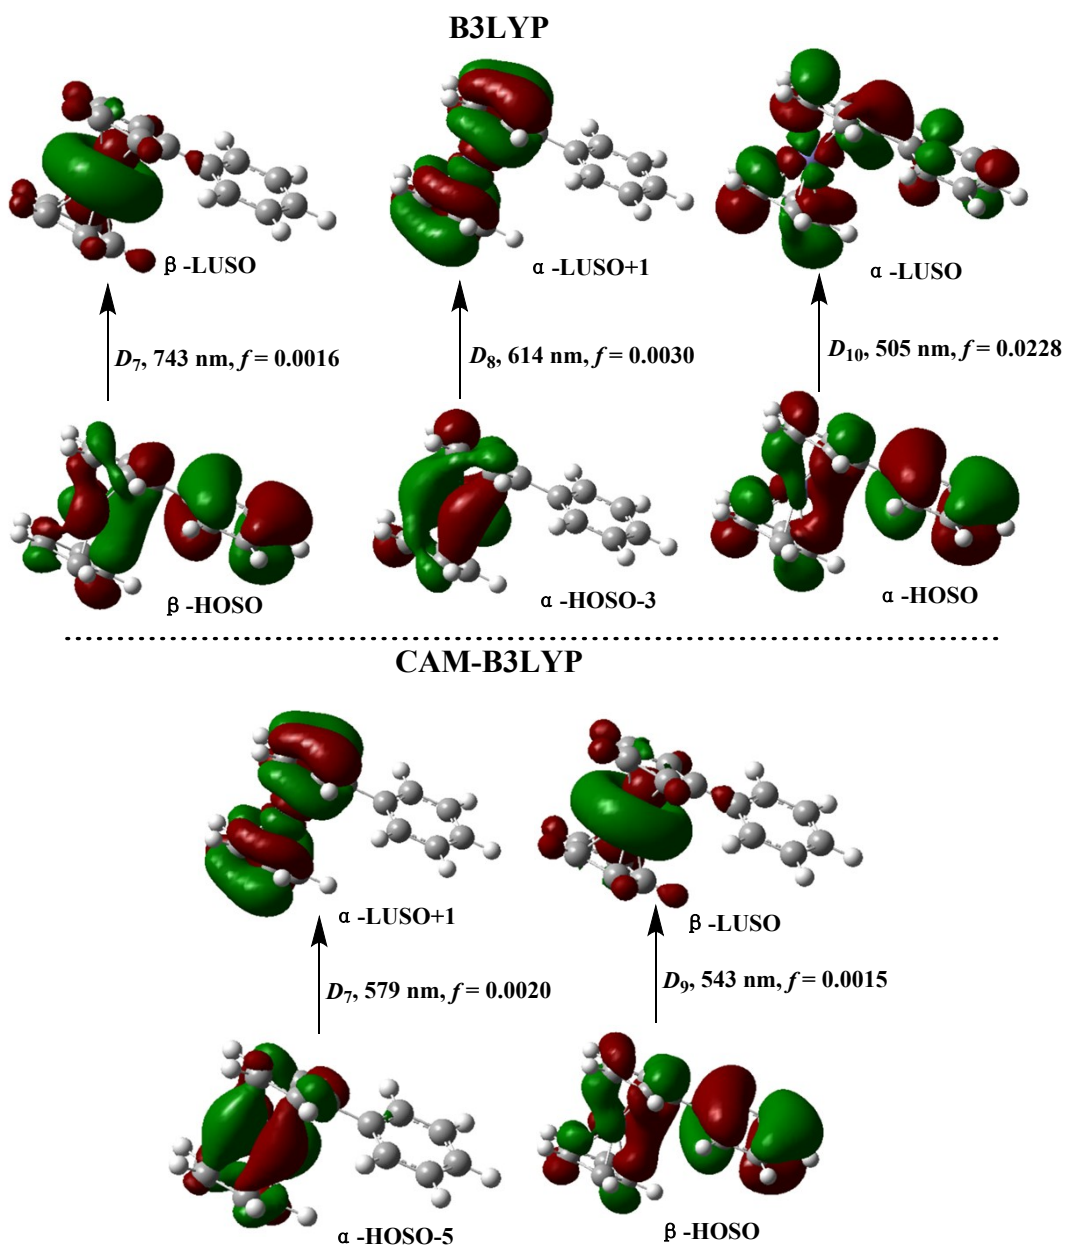

**Figure S17.** Spin orbitals involved in the plausible calculated visible electronic excitations of [Ph-Fc]<sup>+</sup> (see Figures S15 and S16). A better agreement with the experimental visible absorption of the cationic complex has been reached with the B3LYP method.

## NMR Spectra



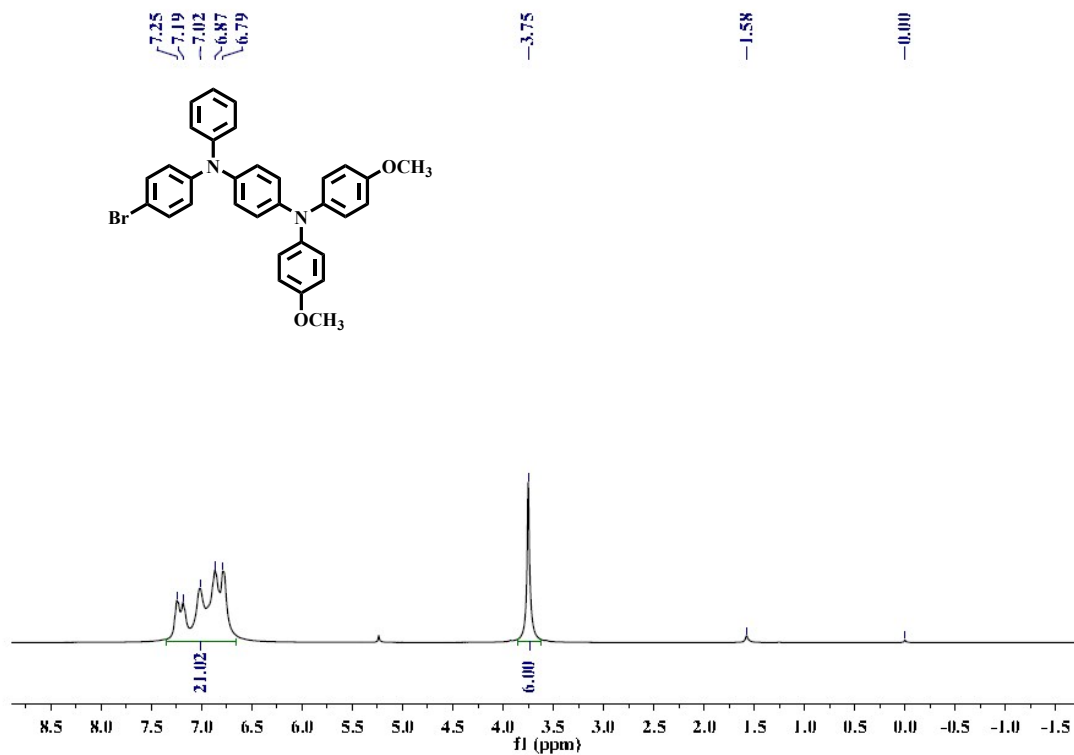

Figure S18.  $^1\text{H}$  NMR spectrum (400 MHz,  $\text{CDCl}_3$ ) of **2c**.

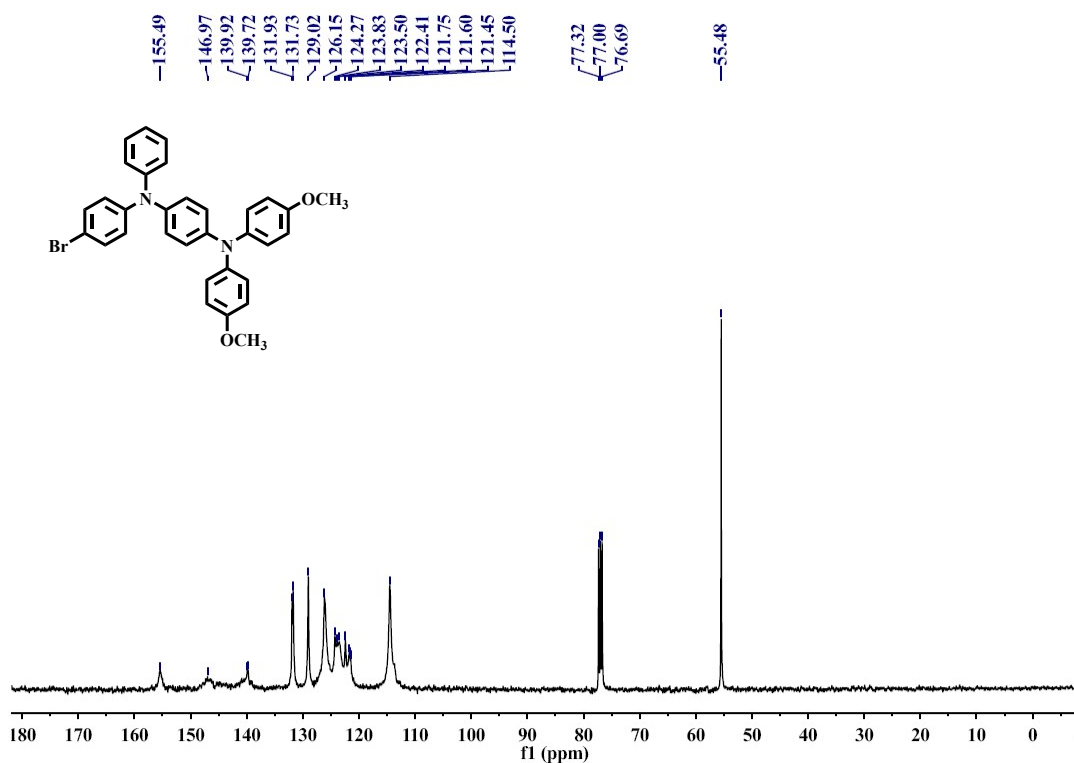

Figure S19.  $^{13}\text{C}$  NMR spectrum (100 MHz,  $\text{CDCl}_3$ ) of **2c**.



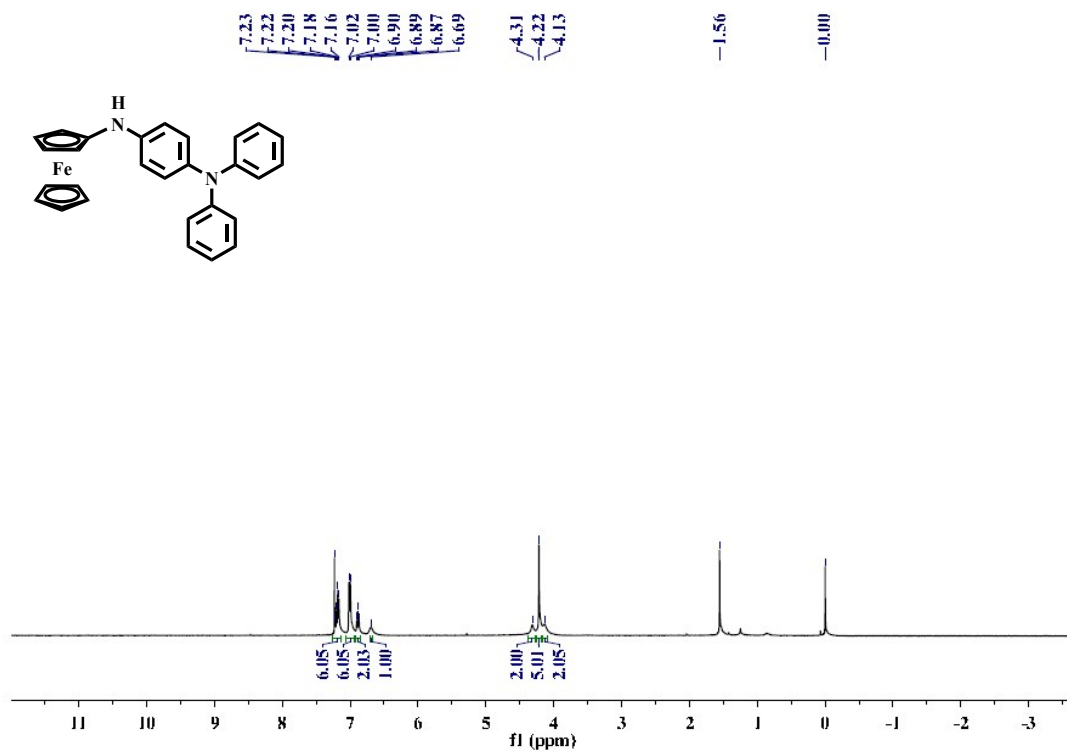

**Figure S20.** <sup>1</sup>H NMR spectrum (400 MHz, CDCl<sub>3</sub>) of **2e**.

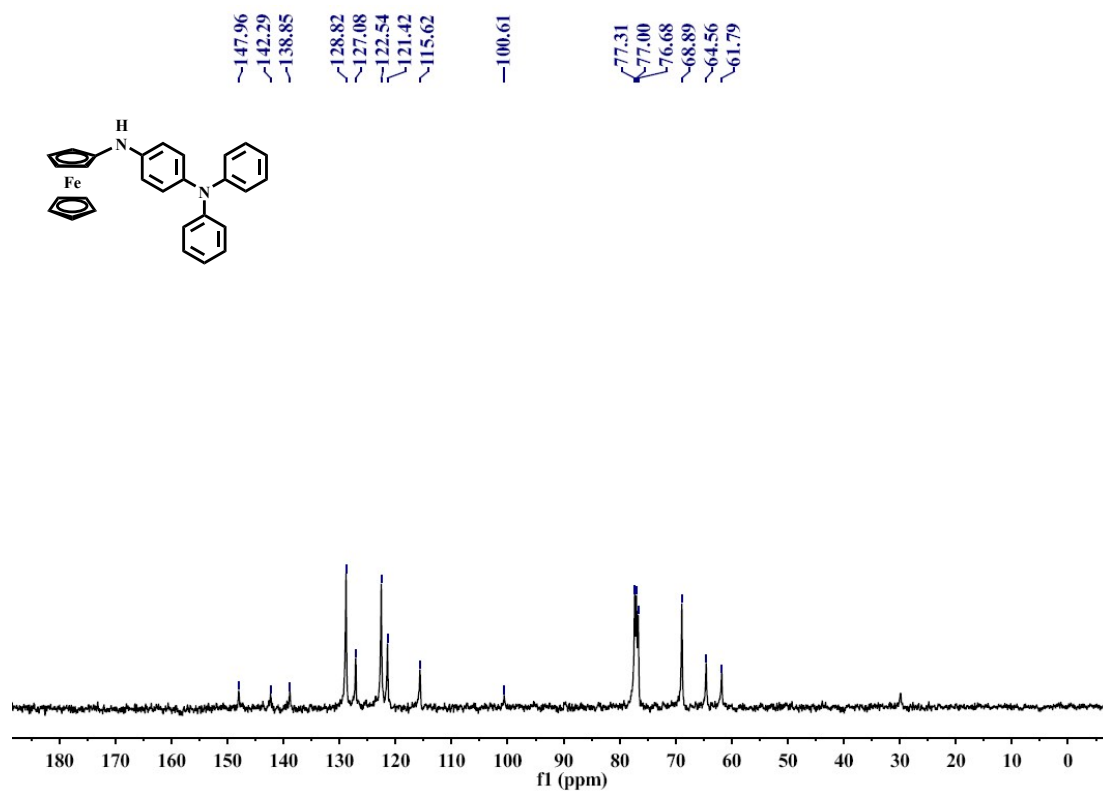

**Figure S21.** <sup>13</sup>C NMR spectrum (100 MHz, CDCl<sub>3</sub>) of **2e**.

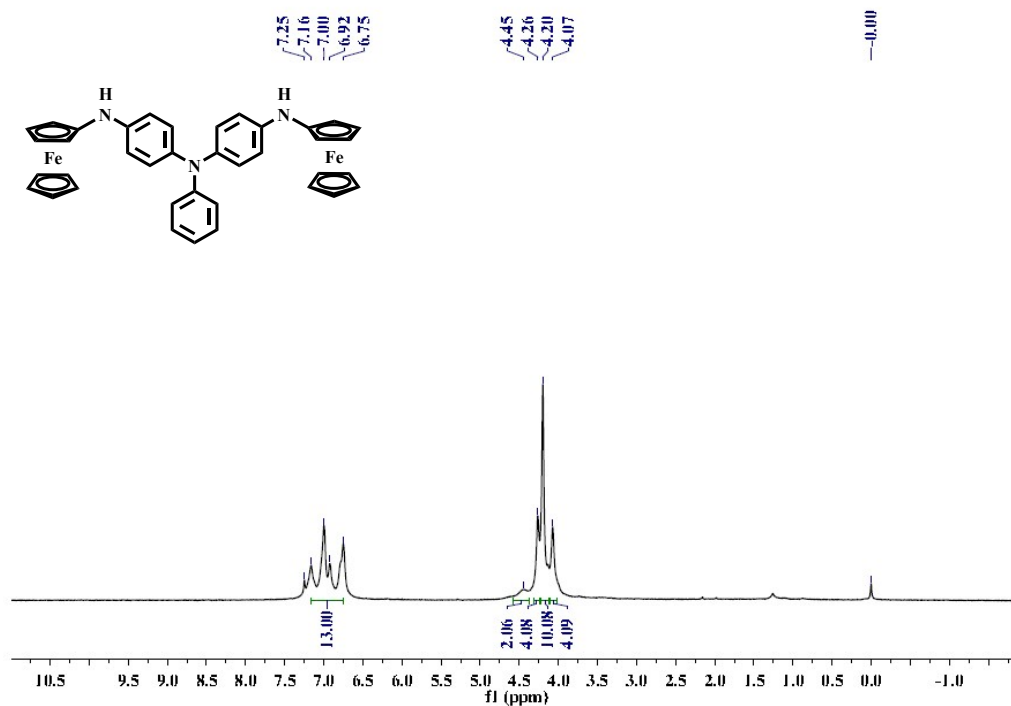

**Figure S22.**  $^1\text{H}$  NMR spectrum (600 MHz,  $\text{CDCl}_3$ ) of **2f**.

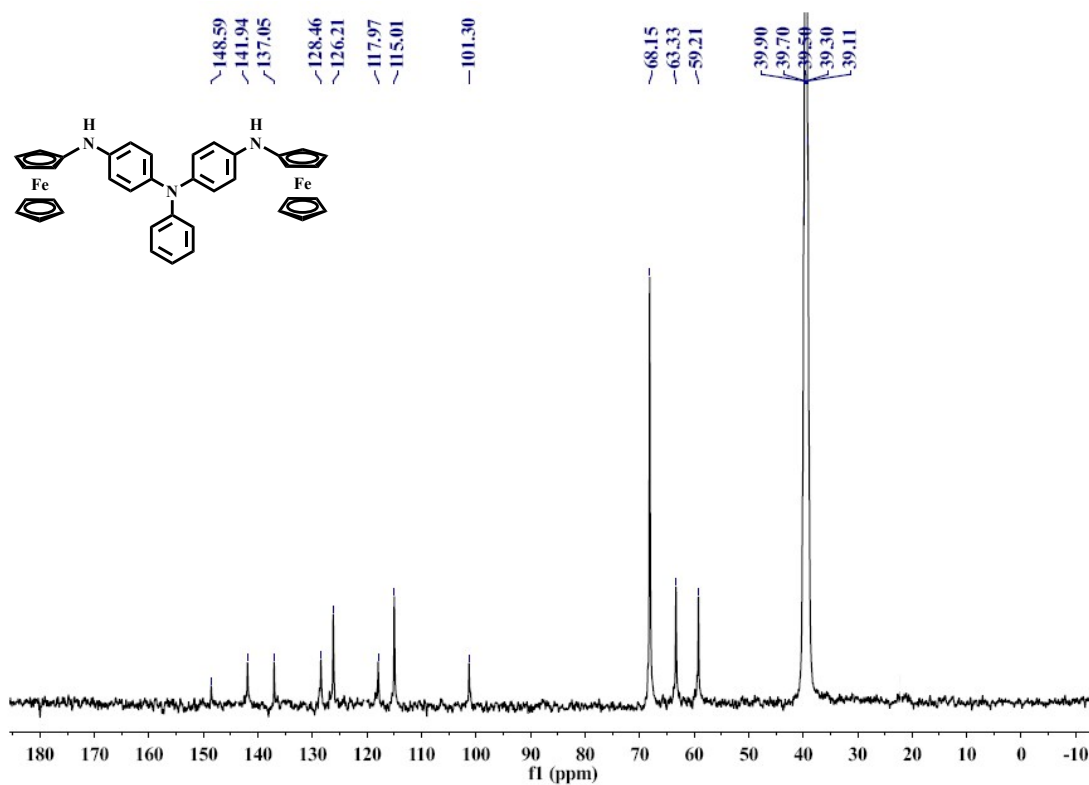

**Figure S23.**  $^{13}\text{C}$  NMR spectrum (100 MHz,  $\text{DMSO-d}_6$ ) of **2f**.

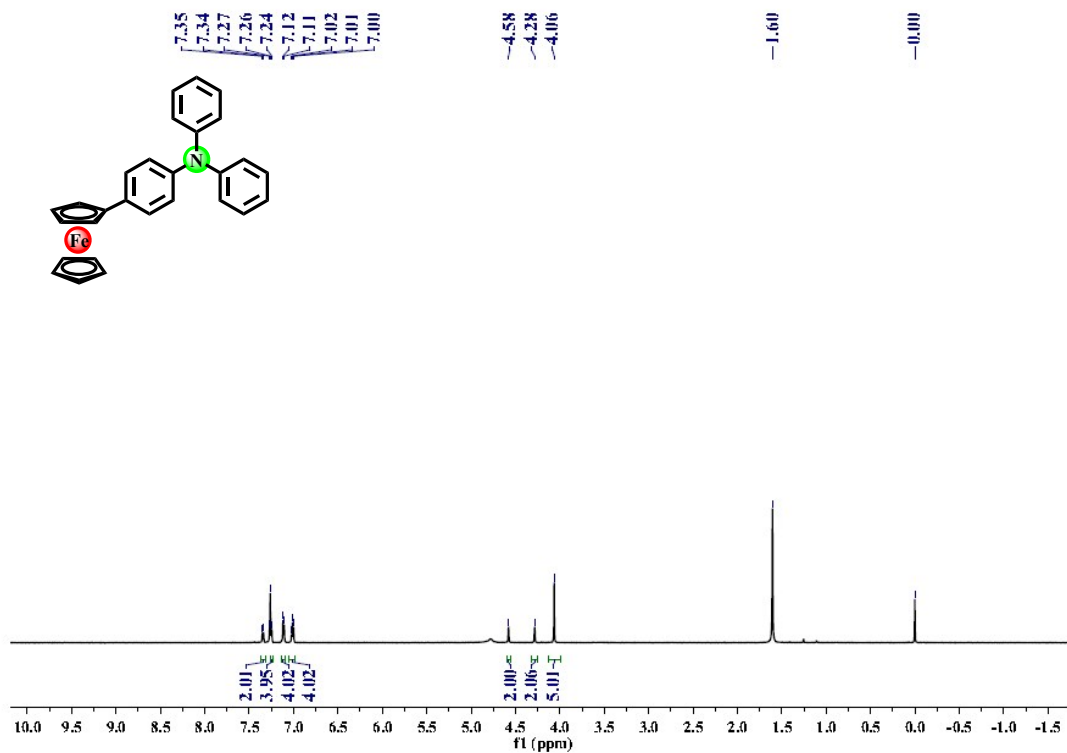

Figure S24.  $^1\text{H}$  NMR spectrum (400 MHz,  $\text{CDCl}_3$ ) of **1a**.

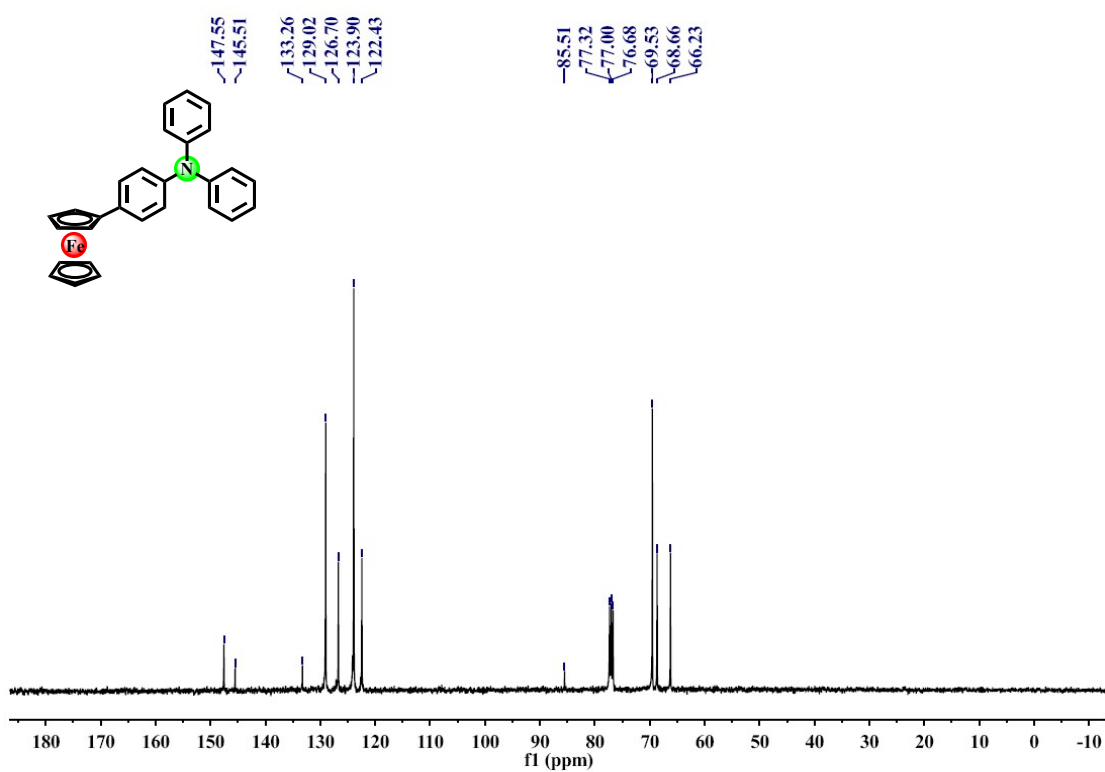

Figure S25.  $^{13}\text{C}$  NMR spectrum (100 MHz,  $\text{CDCl}_3$ ) of **1a**.

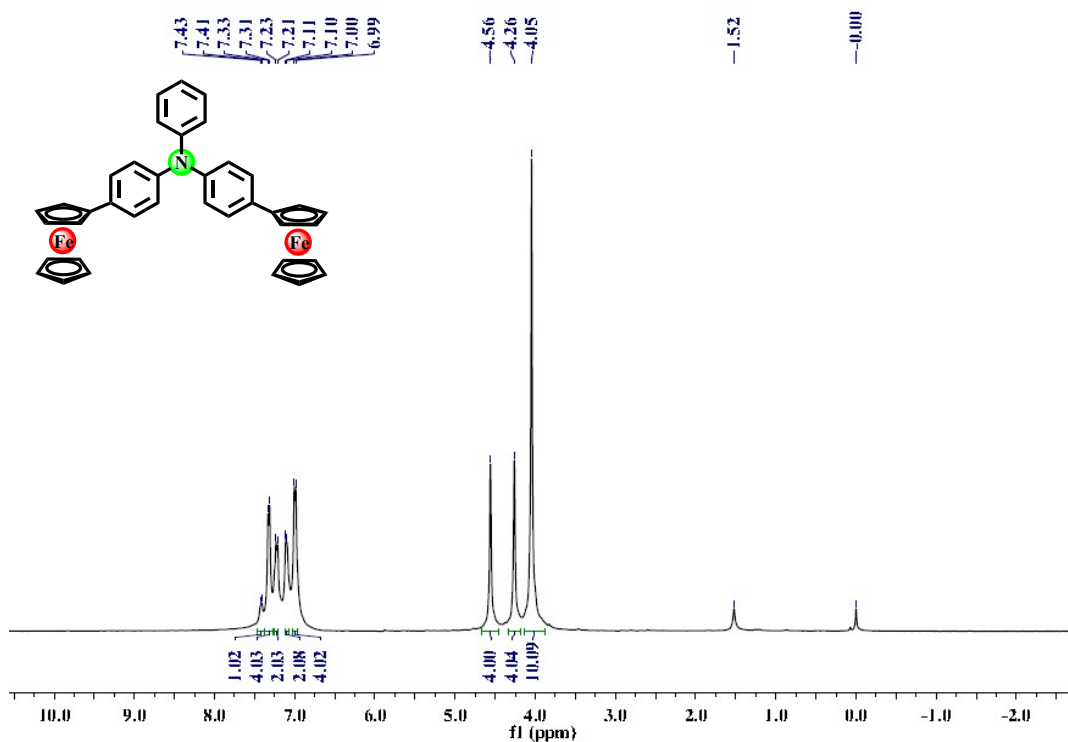

Figure S26.  $^1\text{H}$  NMR spectrum (400 MHz,  $\text{CDCl}_3$ ) of **1b**.

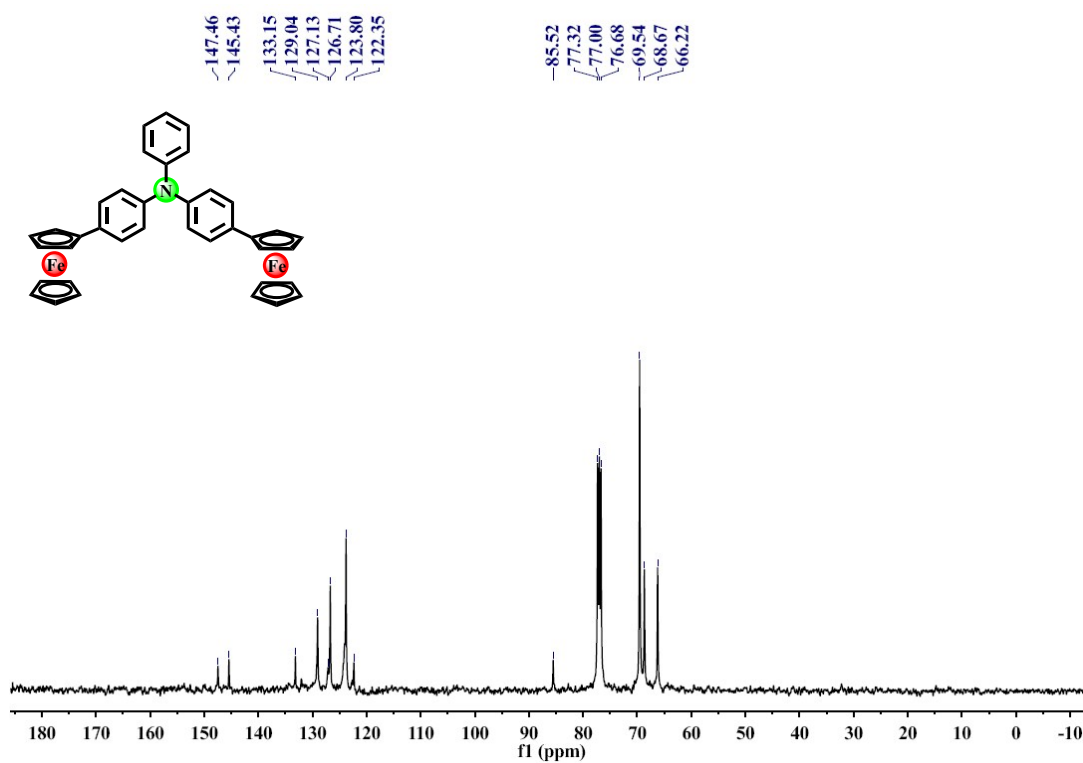

Figure S27.  $^{13}\text{C}$  NMR spectrum (100 MHz,  $\text{CDCl}_3$ ) of **1b**.

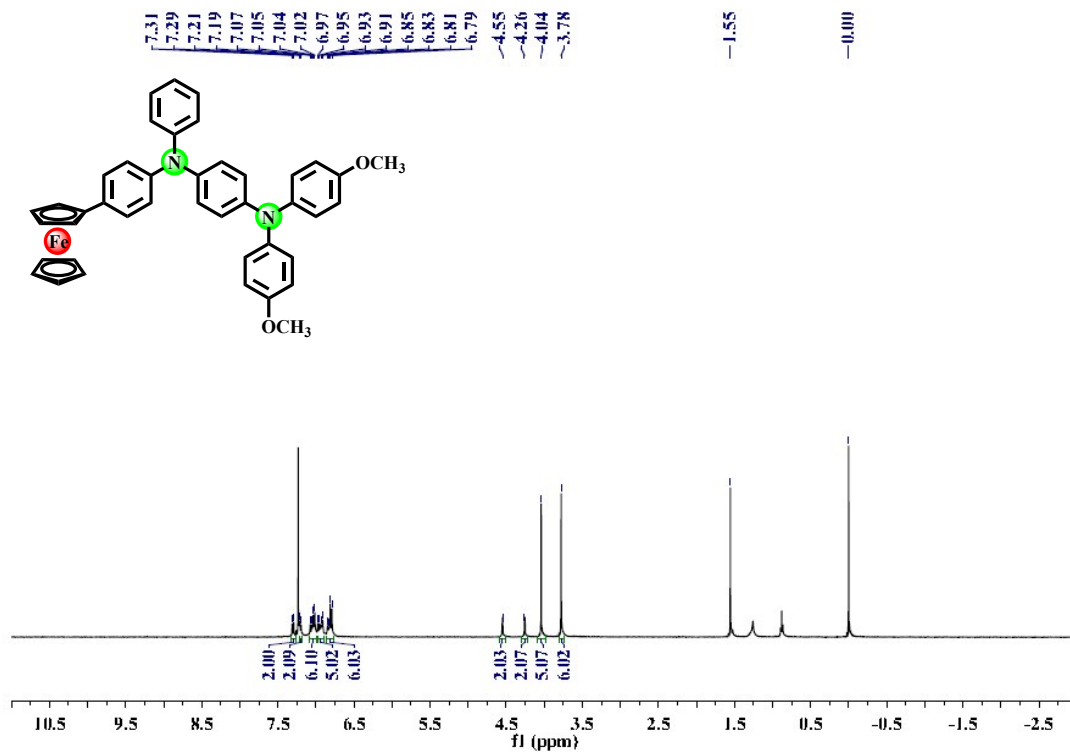

Figure S28.  $^1\text{H}$  NMR spectrum (400 MHz,  $\text{CDCl}_3$ ) of **1c**.

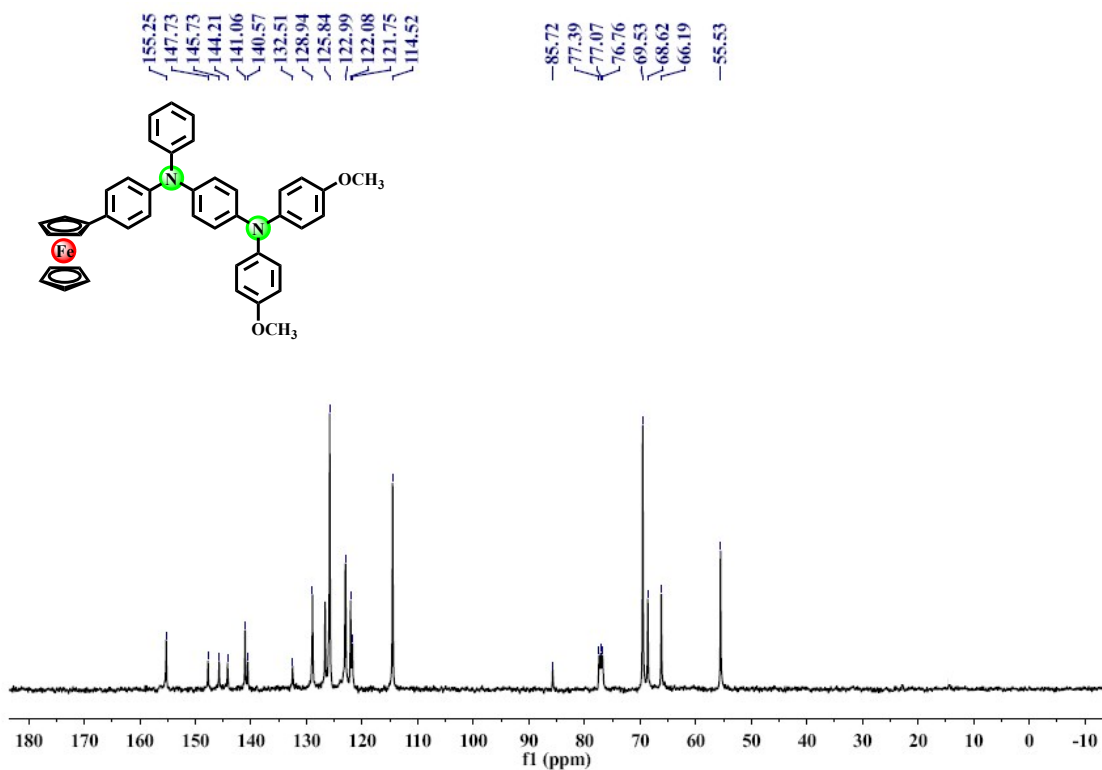

Figure S29.  $^{13}\text{C}$  NMR spectrum (100 MHz,  $\text{CDCl}_3$ ) of **1c**.

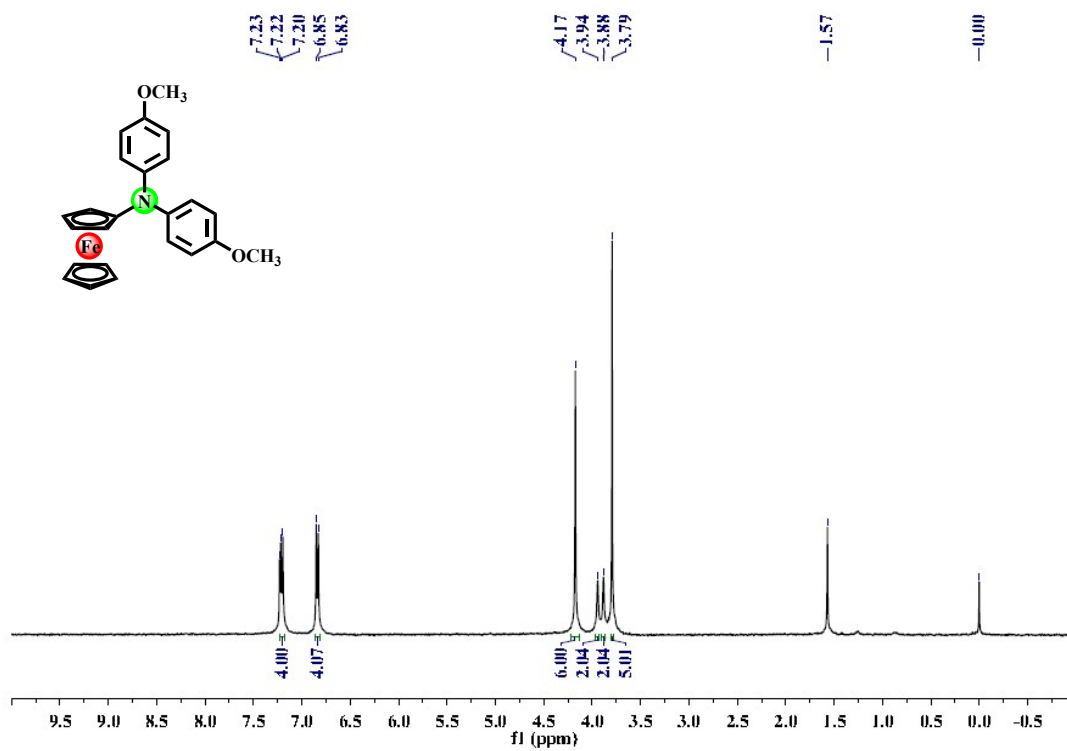

Figure S30. <sup>1</sup>H NMR spectrum (400 MHz, CDCl<sub>3</sub>) of **1d**.

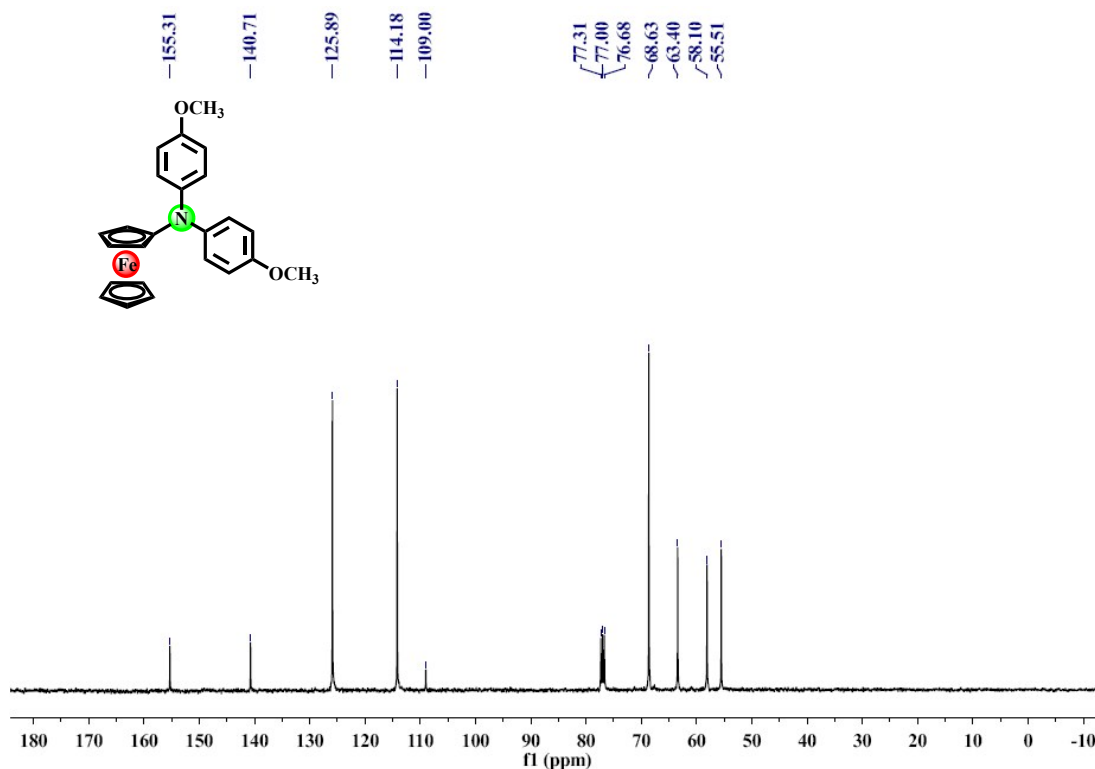

Figure S31. <sup>13</sup>C NMR spectrum (100 MHz, CDCl<sub>3</sub>) of **1d**.

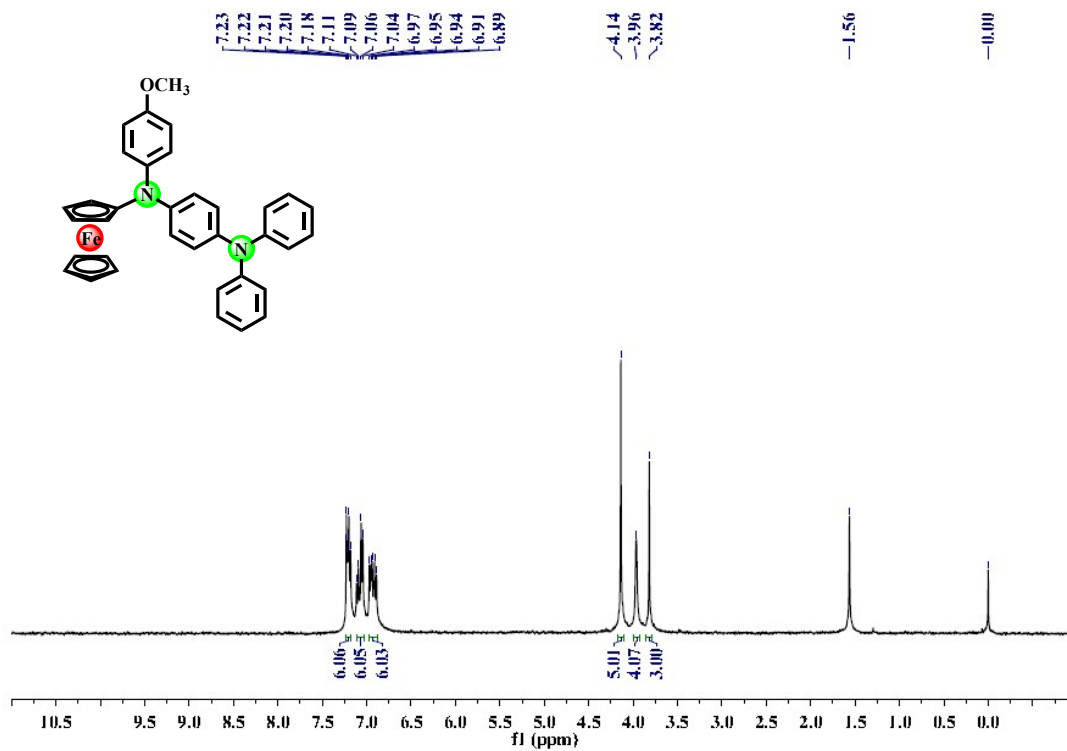

Figure S32.  $^1\text{H}$  NMR spectrum (400 MHz,  $\text{CDCl}_3$ ) of **1e**.

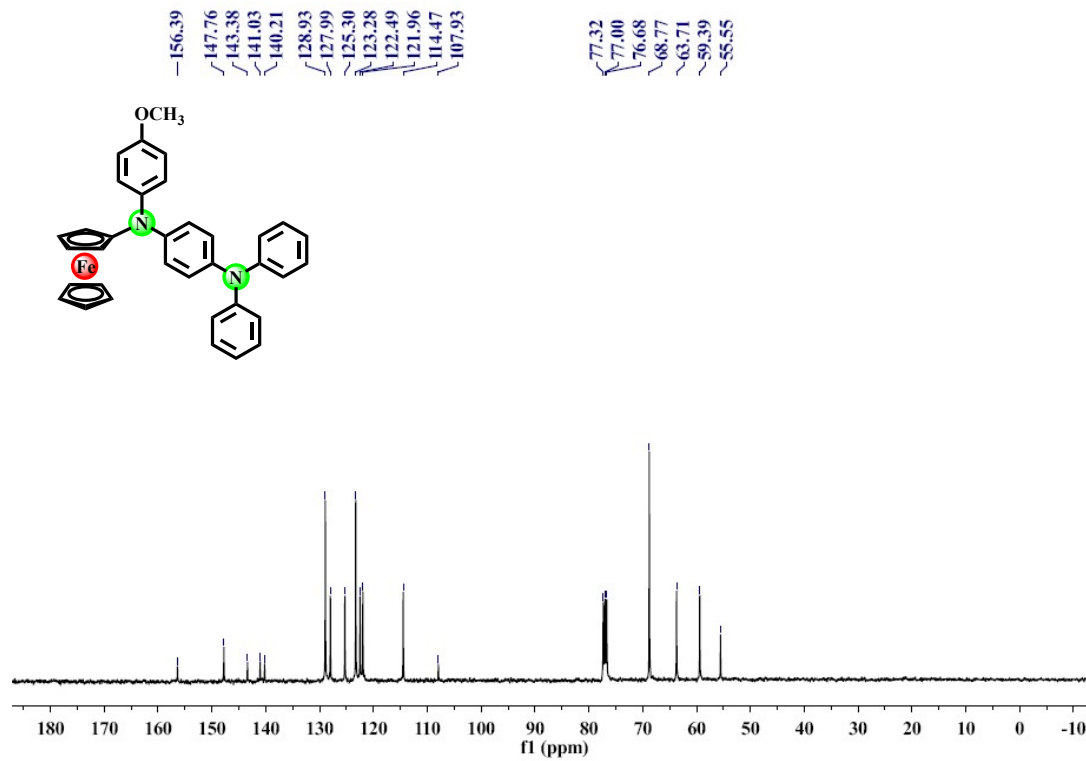

Figure S33.  $^{13}\text{C}$  NMR spectrum (100 MHz,  $\text{CDCl}_3$ ) of **1e**.

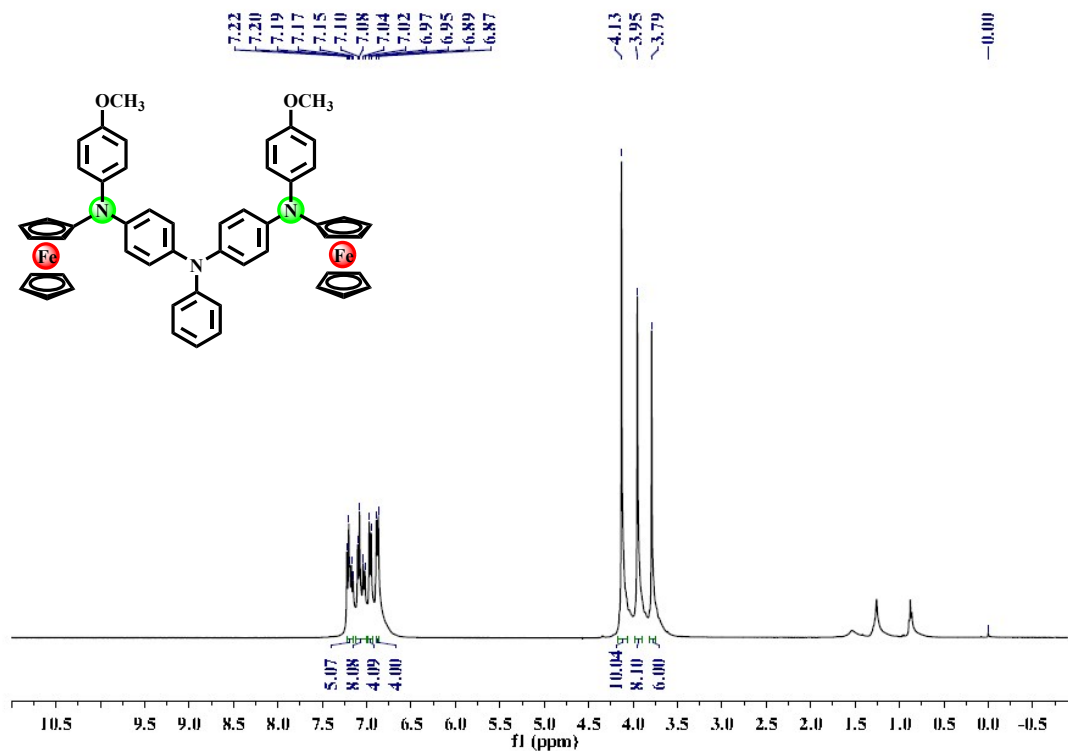

Figure S34.  $^1\text{H}$  NMR spectrum (400 MHz,  $\text{CDCl}_3$ ) of **1f**.

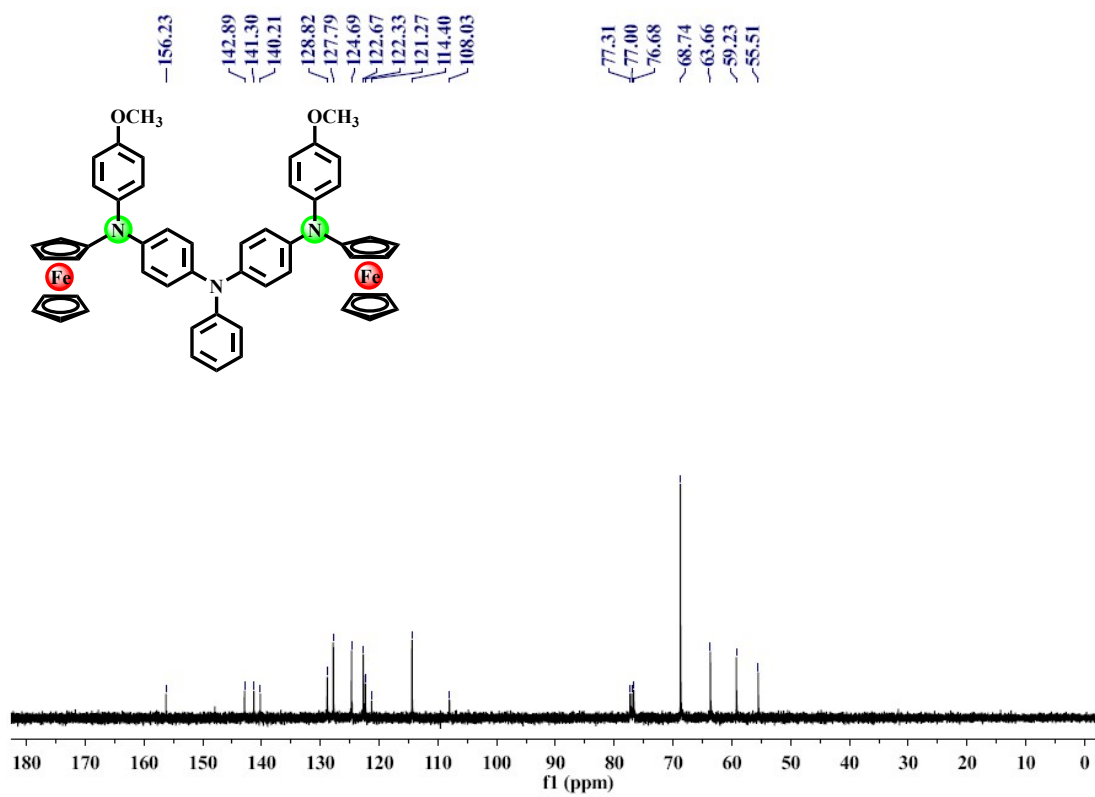

Figure S35.  $^{13}\text{C}$  NMR spectrum (100 MHz,  $\text{CDCl}_3$ ) of **1f**.
